# Supplementary material
Source: PubMed Central journal article supplement (PMC8795463)
Supplement: NIHMS1729405-supplement-supinfo.pdf [file NIHMS1729405-supplement-supinfo.pdf]

# B cell relationship to anti-TNF in RA

Supplementary figures and tables

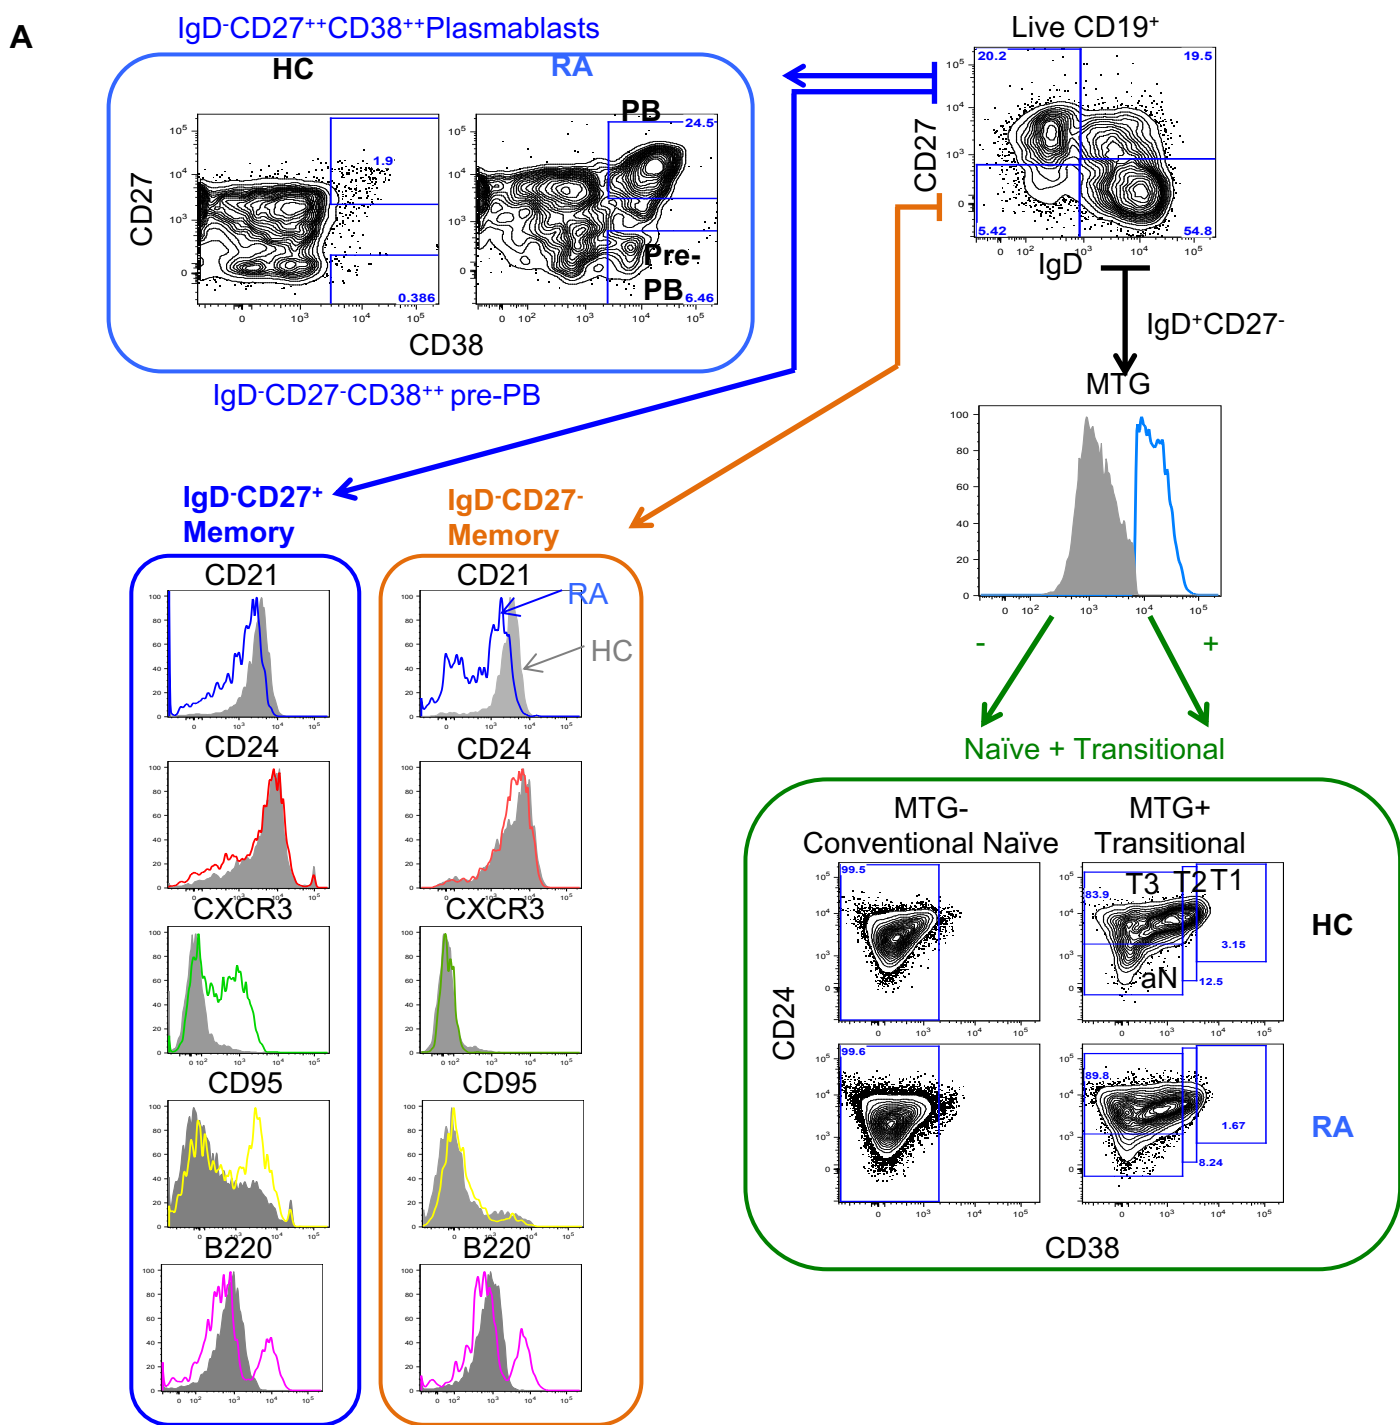

**B**

| B CELL SUBSET     | IDENTIFICATION MARKERS                                                                      | PANEL        | ADDITIONAL MARKERS      |
|-------------------|---------------------------------------------------------------------------------------------|--------------|-------------------------|
| Naïve             | IgD <sup>+</sup> CD27 <sup>-</sup> MTG <sup>-</sup> CD24 <sup>+/-</sup> CD38 <sup>+/-</sup> | Memory       | CXCR3, CD21, CD95, B220 |
| Unswitched Memory | IgM+IgD <sup>+</sup> CD27 <sup>+</sup>                                                      | Transitional | CD10, IgM, CD23         |
| Switched Memory   | IgD <sup>-</sup> CD27 <sup>+</sup> (exclude CD38 <sup>++</sup> )                            | B cell-Ki67  | Ki67, IgA, IgG          |
| Double Negative   | IgD <sup>-</sup> CD27 <sup>-</sup>                                                          |              |                         |
| Transitional 1/2  | IgD <sup>+</sup> CD27 <sup>-</sup> MTG <sup>+</sup> CD24 <sup>++</sup> CD38 <sup>++</sup>   |              |                         |
| Transitional 3    | IgD <sup>+</sup> CD27 <sup>-</sup> MTG <sup>+</sup> CD24 <sup>+</sup> CD38 <sup>+/-</sup>   |              |                         |
| Pre-plasmablast   | IgD <sup>-</sup> CD27 <sup>-</sup> CD24 <sup>-</sup> CD38 <sup>++</sup>                     |              |                         |
| Plasmablasts      | IgD <sup>-</sup> CD27 <sup>++</sup> CD38 <sup>++</sup>                                      |              |                         |
| Activated naïve   | IgD <sup>+</sup> CD27 <sup>-</sup> MTG <sup>+</sup> CD24 <sup>+/-</sup> CD38 <sup>+/-</sup> |              |                         |

**Supplementary Figure 1. Gating strategy for B cell subsets.** (A) Gating scheme for core B cell subsets. IgD and CD27 are used to define Naïve, Unswitched memory, Switched memory and Double negative B cells. Within IgD<sup>-</sup> B cells, plasmablast and pre-plasmablast are defined as CD27<sup>++</sup>CD38<sup>++</sup> and CD27<sup>-</sup>CD38<sup>++</sup> respectively. Within IgD<sup>+</sup>CD27<sup>-</sup>, mitotracker (MTG) is used to separate transitional B cells from conventional naïve B cells. CD38 and CD24 are used to delineate transitional B cell subsets and identify activated naïve B cells. In addition, additional markers are evaluated in core B cell subsets including CD21, CD24, CD95, CXCR3 and B220. Examples of healthy control (HC) and RA participants are shown. (B) Definitions of B cell subsets and additional makers evaluated in this study.

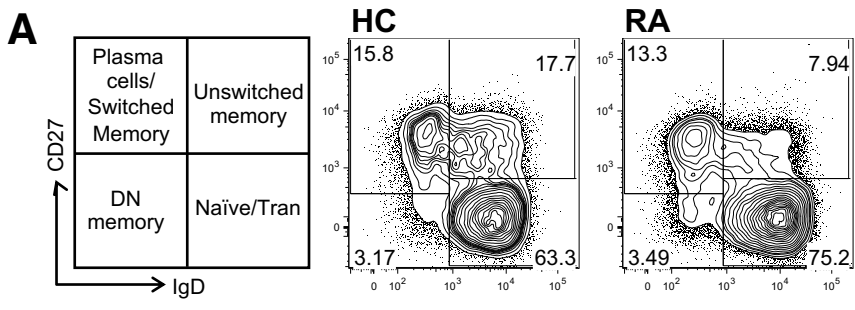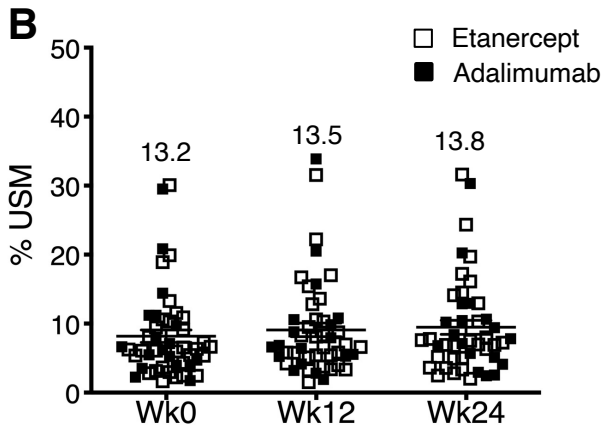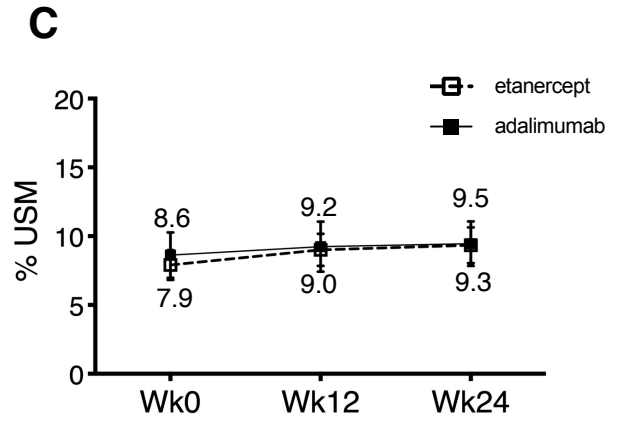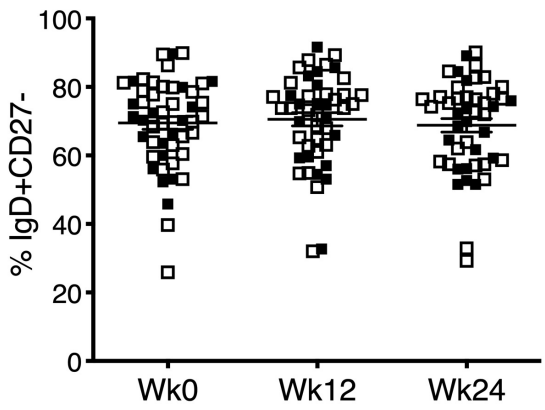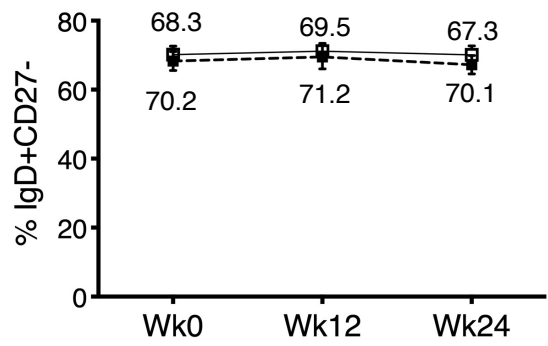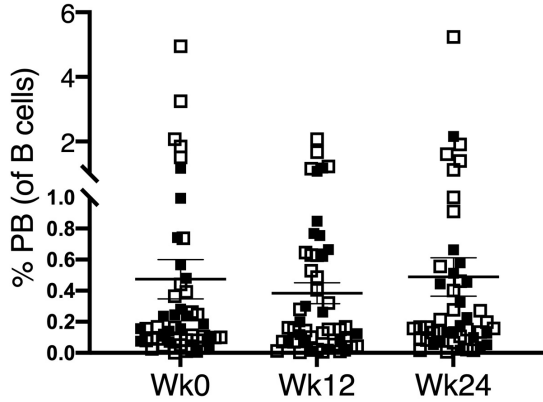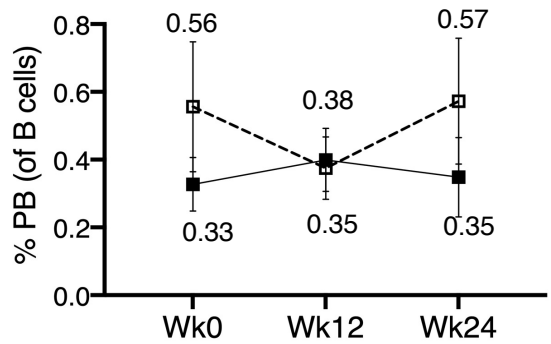

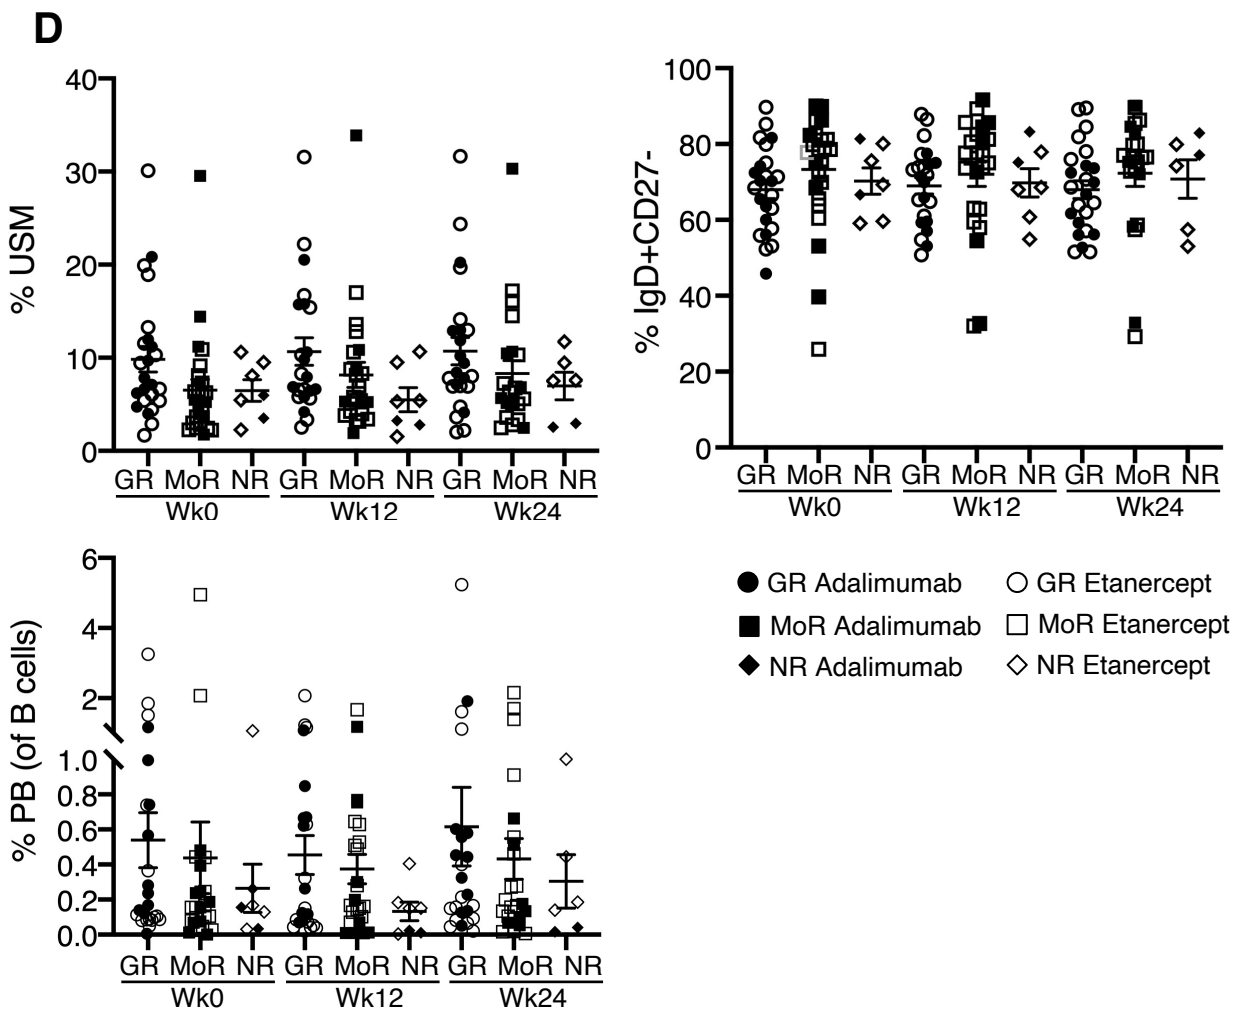

**Supplementary Figure 2. Core B cell subsets over time.** (A) Dot plot example of B cell subsets based on CD27 and IgD expression from healthy control (HC) and RA participants. (B) Scatter plots of frequencies of unswitched memory (USM), and IgD+CD27- (Naïve+T) of total CD19+ B cells over time, n=49. (C) Line plot of USM, and IgD+CD27- frequencies over time (mean±SEM) in each treatment group. n=18 adalimumab, n=31 etanercept. (D) Scatter plots represent frequencies of USM, IgD+CD27- and plasma cell (PC) over time for non-responders (NR: n=7 Wk0, n=7 Wk12, n=6 Wk24), good responders (GR: n=24 Wk0, n=23 Wk12, n=24 Wk24) and moderate responders (MoR: n=25 Wk0, n=24 Wk12, n=22 Wk24). Error bars depict Mean± SEM. All longitudinal comparisons resulted in p-value > 0.05.

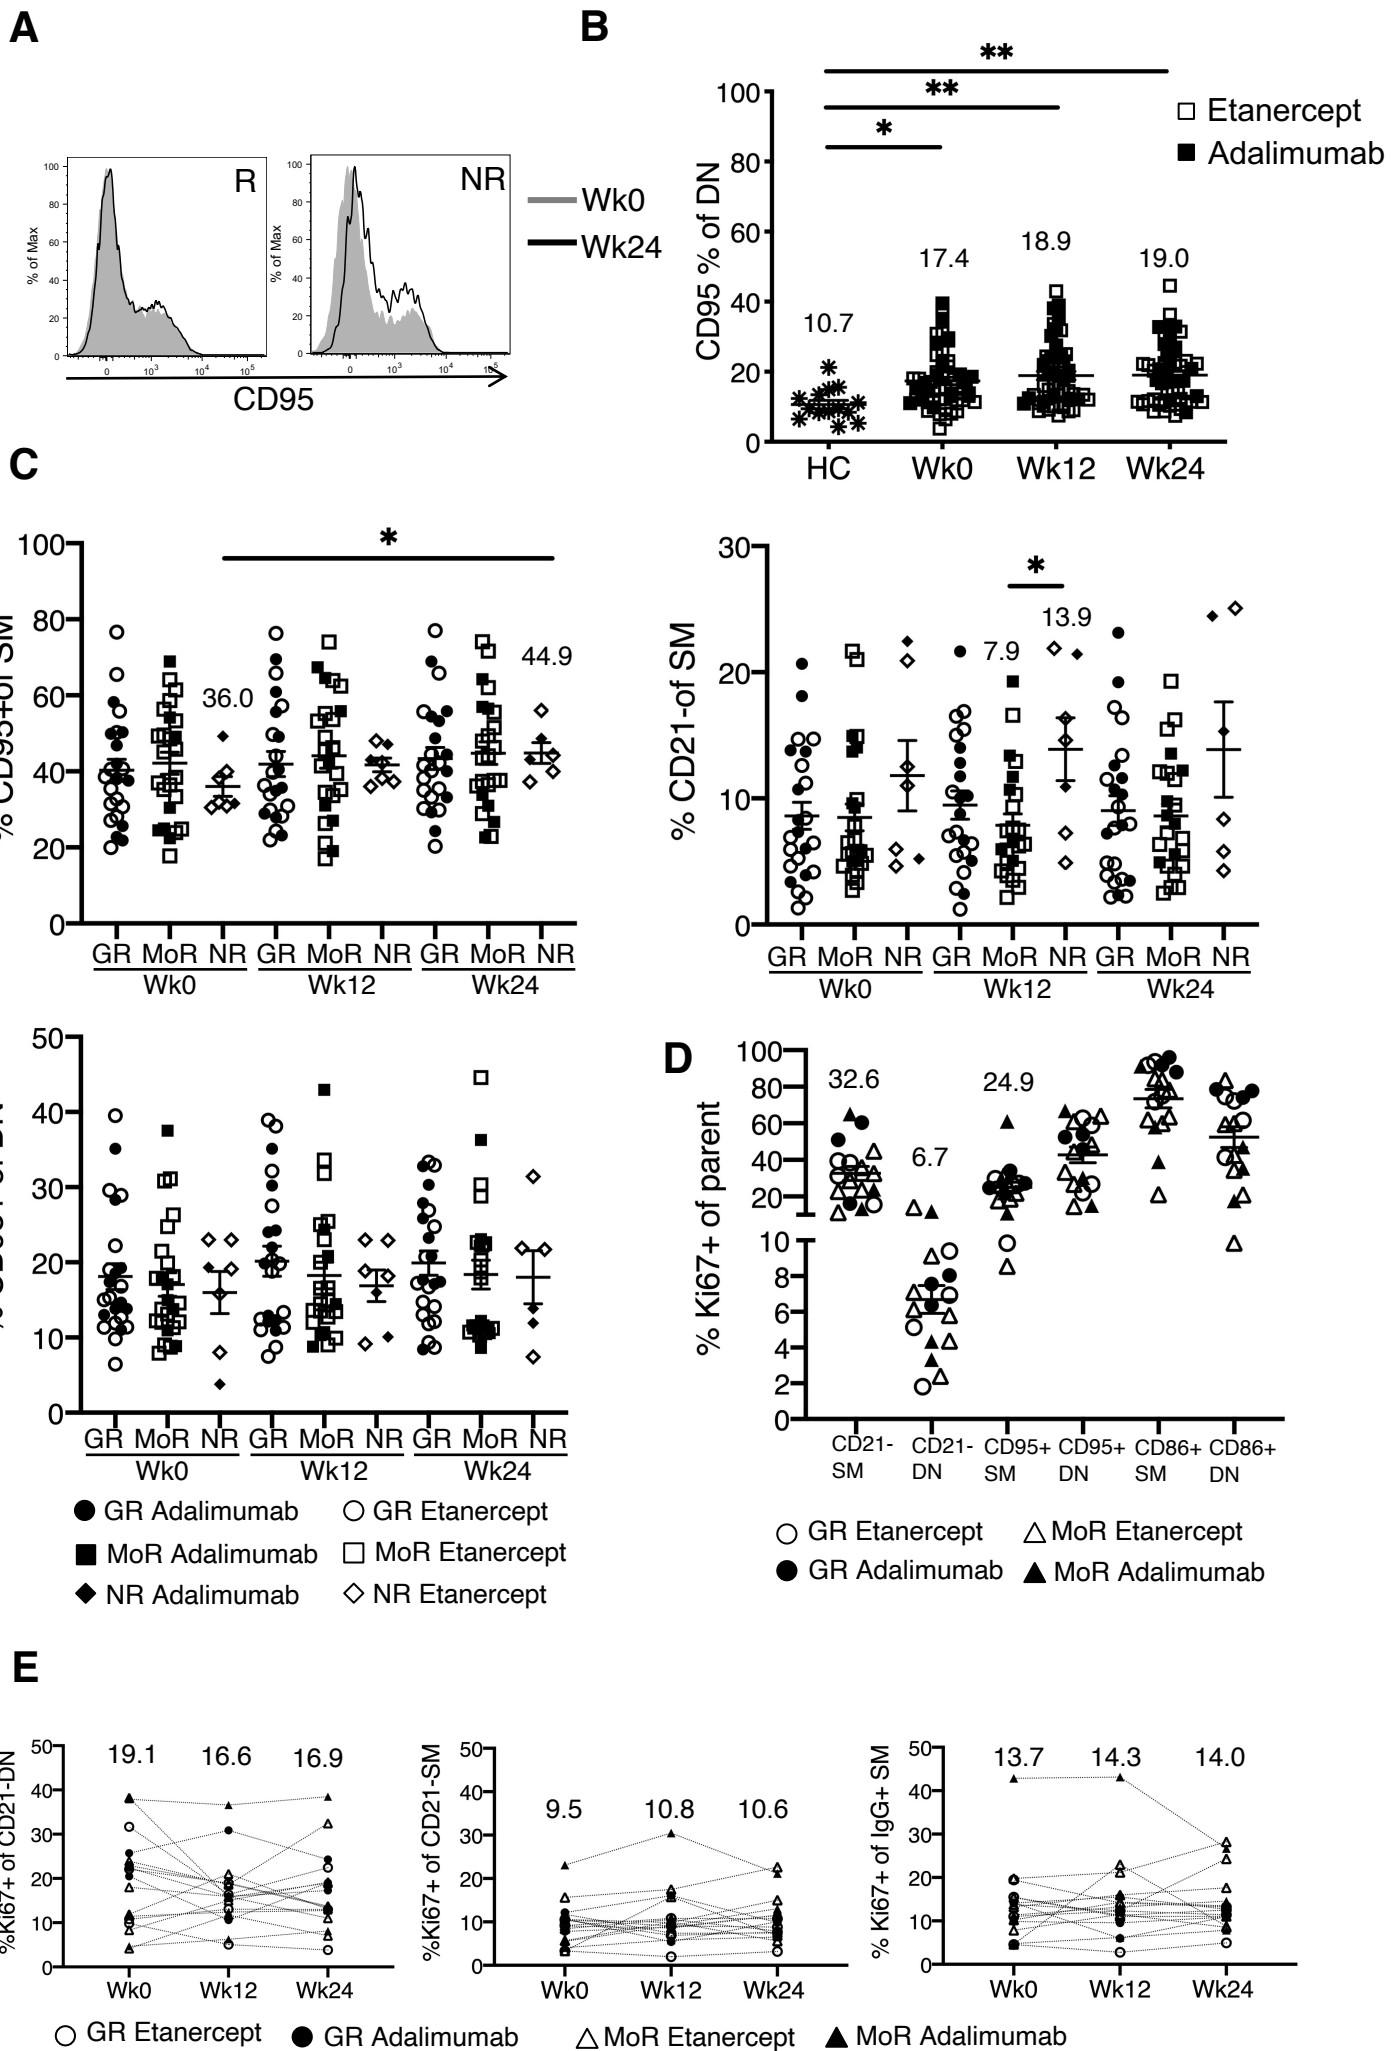

**Supplementary Figure 3. RA responders have lower frequencies of activated memory B cells and more proliferating B cells.** (A) example of CD95 histogram in a responder (R) and a non-responder (NR) at baseline (Wk0) and Wk24. (B) CD95+ DN at Wk0 (n=49), Wk12 (n=48) and Wk24 (n=46) compared to healthy controls (HC, n=14). \*p<0.05, \*\*p<0.01. (C) Means (SEM) for % CD95+ SM, CD95+ DN, and CD21- SM at different time points for good, moderate and non-responders. \*p<0.05. (D) In a subset of participants, the B cell compartment was evaluated with Ki67 expression. Scatter plot shows frequencies of Ki67+ in CD21- CD95+, or CD86+ SM and CD21-, CD95+, or CD86+ DN. The data in both graphs are from participants who are good responders (GR, n=7) or moderate responders (MoR, n=10) (no non-responder B cells available for analysis) at Wk0. Error bars are Mean $\pm$  SEM. (E) Line plots represent frequencies of Ki67+ in CD21- DN, CD21-SM and in IgG+ SM B cells. Each line represents individual patient plot over time (n=7 good responders (GR), n=10 moderate responders (MoR)). The values on the graphs represent the mean.

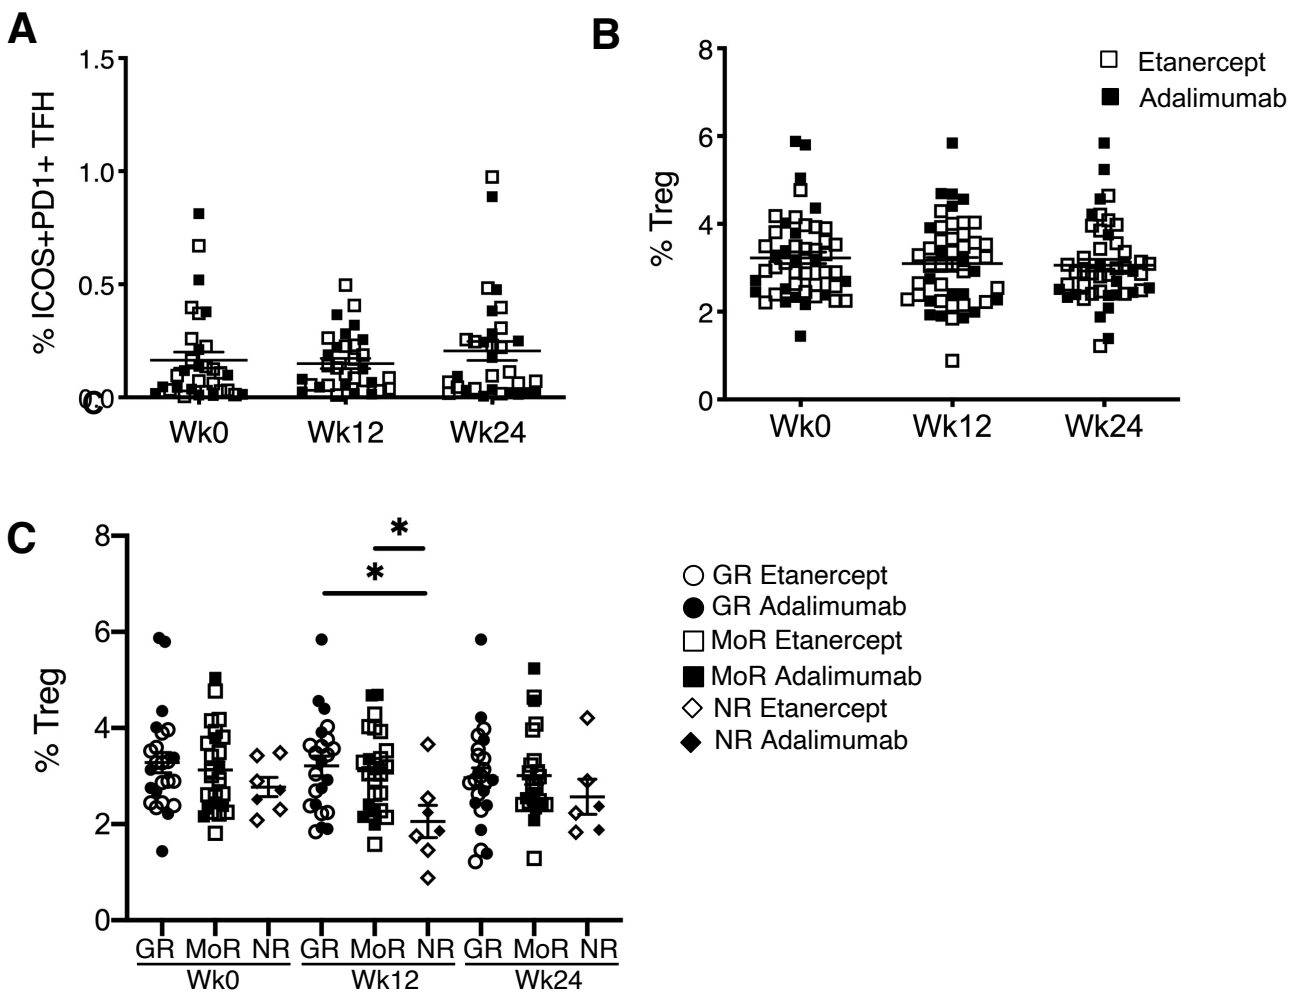

**Supplementary Figure 4. Frequency of T cell subsets. (A)** Circulating TFH cells were defined as CXCR5+ICOS+PD1+ cells. Scatter plots show frequencies of TFH express as % of CD3+ T cells from a subset of participants (n=32) regardless of treatment at Wk0, Wk12 and Wk24. **(B)** Regulatory T cells (Treg) were classified as CD4+CD25+CD127low/-. Scatter plots represent percent of Treg express as % of CD3+ T cells from all participants (n=56 Wk0, n=54 Wk12, n=52 Wk24) regardless of treatment at Wk0, Wk12 and Wk24. **(C)** Scatter plots represent frequencies of Treg as % of CD3+ T cells in participants separated by response status and time points, Good responder (GR: n=24 Wk0, n=23 Wk12, n=24 Wk24), moderate responder (MoR: n=25 Wk0, n=24 Wk12, n=24 Wk24) and non-responders (NR: n=7 Wk0, n=7 Wk12, n=6 Wk24). \* p<0.01 non-responders vs. good and moderate responders.

**Supplemental table 1. Changes in B cell populations over time. B cell subset by treatment group (PP)**

|                             |           | <b>Etanercept</b> | <b>Adalimumab</b> | <b>P-value*</b> |
|-----------------------------|-----------|-------------------|-------------------|-----------------|
| <b>Primary Analysis:</b>    |           |                   |                   |                 |
| <b>CD27+ SM (% parent)</b>  |           | N=30              | N= 18             |                 |
| <b>Week 0</b>               | Mean (SE) | 12.4 (1.5)        | 14.1 (1.9)        |                 |
| <b>Week 12</b>              | Mean (SE) | 13.2 (1.3)        | 13.8 (1.7)        |                 |
| <b>Adjusted Change</b>      | Mean (SE) | 0.7 (0.5)         | -0.1 (0.6)        | 0.301           |
| <b>Secondary Analyses:</b>  |           |                   |                   |                 |
| <b>CD27+ USM (% parent)</b> |           | N=30              | N=18              |                 |
| <b>Week 0</b>               | Mean (SE) | 7.6 (1.1)         | 8.6 (1.7)         |                 |
| <b>Week 12</b>              | Mean (SE) | 9.0 (1.2)         | 9.2 (1.8)         |                 |
| <b>Adjusted Change</b>      | Mean (SE) | 1.5 (0.5)         | 0.6 (0.6)         | 0.237           |
| <b>DN (% parent)</b>        |           | N=30              | N=18              |                 |
| <b>Week 0</b>               | Mean (SE) | 6.1 (0.6)         | 6.8 (0.7)         |                 |
| <b>Week 12</b>              | Mean (SE) | 5.7 (0.6)         | 5.4 (0.8)         |                 |
| <b>Adjusted Change</b>      | Mean (SE) | -0.5 (0.4)        | -1.3 (0.5)        | 0.227           |
| <b>Naïve (% parent)</b>     |           | N=30              | N=18              |                 |
| <b>Week 0</b>               | Mean (SE) | 72.0 (2.5)        | 68.8 (3.2)        |                 |
| <b>Week 12</b>              | Mean (SE) | 70.6 (2.2)        | 70.3 (3.4)        |                 |
| <b>Adjusted Change</b>      | Mean (SE) | -1.3 (0.9)        | 1.2 (1.1)         | 0.074           |

\*P-value is testing for treatment effect for an analysis of covariance with adjustments for baseline.

**Supplemental table 2. Changes in B cell populations over time. Core B cell subsets.**

| <b>Response*</b>  | <b>Time (Wk)</b> | <b>Naïve+T#</b> | <b>USM#</b> | <b>SM#</b> | <b>DN#</b> |
|-------------------|------------------|-----------------|-------------|------------|------------|
| <b>GR (n=24)</b>  | 0                | 68.0±2.3        | 9.8±1.4     | 13.6±1.4   | 6.5±0.5    |
| <b>(n=23)</b>     | 12               | 69.0±2.2        | 10.7±1.5    | 13.4±1.1   | 5.4±0.4    |
| <b>(n=24)</b>     | 24               | 68.0±2.3        | 10.7±1.5    | 13.9±1.3   | 5.5±0.5    |
| <b>MoR (n=25)</b> | 0                | 73.3±3.1        | 6.7±1.1     | 12.5±1.8   | 6.0±0.6    |
| <b>(n=24)</b>     | 12               | 72.0±3.2        | 8.2±1.4     | 13.4±1.8   | 5.2±0.7    |
| <b>(n=22)</b>     | 24               | 72.3±3.4        | 8.3±1.4     | 13.7±2.1   | 4.6±0.5    |
| <b>NR (n=7)</b>   | 0                | 70.2±3.5        | 6.0±1.3     | 13.5±1.9   | 8.7±1.5    |
| <b>(n=7)</b>      | 12               | 69.8±3.7        | 5.5±1.3     | 14.3±2.6   | 8.6±1.8    |
| <b>(n=6)</b>      | 24               | 70.8±5.1        | 7.0±1.5     | 13.1±3.1   | 7.1±1.9    |

\* the frequencies of B cell subsets were compared between response groups at each time point using Tukey's comparison test. p-value for all comparisons were greater than 0.05.  
 # Naïve+T=IgD+CD27-, USM=unswitched memory=IgD+CD27+, SM=switched memory=IgD-CD27+, DN=double negative=IgD-CD27- (expressed as frequency of parent CD19+ population). GR=good responder, MoR=moderate responder, NR=non-responder. N's provided as a range as the number available for each visit varied by cell subset.



**Supplemental table 3. Changes in B cell populations over time. Additional B cell subsets**

| Response*            | Time (Wk) | T1/2 <sup>#</sup> | T3 <sup>#</sup> | Pre-PB <sup>#</sup> | PB <sup>#</sup> | acN <sup>#</sup> |
|----------------------|-----------|-------------------|-----------------|---------------------|-----------------|------------------|
| <b>GR (n=24)</b>     | 0         | 1.2±0.1           | 19.6±2.0        | 1.4±0.4             | 2.8±1.0         | 6.4±0.7          |
| <b>(n=23)</b>        | 12        | 1.0±0.2           | 20.3±2.4        | 1.1±0.3             | 2.3±0.6         | 6.9±0.8          |
| <b>(n=23-24)</b>     | 24        | 1.5±0.3           | 22.3±2.6        | 1.3±0.3             | 3.1±1.0         | 6.5±0.8          |
| <b>MoR (n=24-25)</b> | 0         | 1.4±0.3           | 15.5±1.3        | 1.3±0.3             | 2.9±1.6         | 6.8±1.0          |
| <b>(n=23-24)</b>     | 12        | 1.2±0.2           | 18.0±2.2        | 1.0±0.2             | 2.5±0.6         | 6.5±0.9          |
| <b>(n=21-22)</b>     | 24        | 1.3±0.2           | 16.8±1.9        | 1.0±0.2             | 2.1±0.6         | 6.6±1.1          |
| <b>NR (n=7)</b>      | 0         | 0.3±0.1           | 19.2±4.4        | 0.9±0.4             | 1.2±0.5         | 14.6±1.7         |
| <b>(n=7)</b>         | 12        | 0.5±0.3           | 20.1±4.5        | 0.8±0.6             | 1.0±0.7         | 15.6±1.8         |
| <b>(n=6)</b>         | 24        | 0.7±0.4           | 18.7±4.4        | 0.9±0.6             | 2.6±1.9         | 14.2±3.1         |

\* the frequencies of B cell subsets were compared between response groups at each time point using Tukey's comparison test. p-value for all comparisons were greater than 0.05.

<sup>#</sup> T1/2=transitional 1 and 2, T3=transitional 3 (expressed as frequency of CD19+). Pre-PB, PB=plasmablast (expressed as frequency of parent CD19+MTG+IgD-) (Mean±SEM). GR=good responder, MoR=moderate responder, NR=non-responder. N's provided as a range as the number available for each visit varied by cell subset.
